# Supplementary material
Source: HighWire-hosted journal article supplement (https://sit.bmj.com/highwire/filestream/357/field_highwire_adjunct_files/2/bmjsit-2020-000071supp003_data_supplement.pdf)
Supplement: bmjsit-2020-000071supp003_data_supplement.pdf [file bmjsit-2020-000071supp003_data_supplement.pdf]

**Table S3: Breakdown of cost of managing complications involved in PAE and TURP.**

| Complication           |                                                                     | Cost (£ per patient) | Reference | Comments                                                                                                                                                                                                                                                                                                                                                                                                                        |
|------------------------|---------------------------------------------------------------------|----------------------|-----------|---------------------------------------------------------------------------------------------------------------------------------------------------------------------------------------------------------------------------------------------------------------------------------------------------------------------------------------------------------------------------------------------------------------------------------|
| Haematuria             |                                                                     | 1316.50              | [21]      | Average of all of the unspecified haematuria combined day case/ordinary elective spell tariff prices with/without intervention based on the assumption that not all complications require intervention*<br><br>The cost of managing haematuria included in sensitivity analysis 3 only (all other analyses assume the cost of managing haematuria to be nil as complication resolves without treatment in majority of patients) |
| Haematospermia         |                                                                     | 0                    | [17]      |                                                                                                                                                                                                                                                                                                                                                                                                                                 |
| Incontinence           |                                                                     | 1,203.33             | [20]      | Average of all of the urinary incontinence combined day case/ordinary elective spell tariff prices with/without intervention based on the assumption that not all complications require intervention**                                                                                                                                                                                                                          |
| Urinary Infection      | Urinalysis (using dipstick)                                         | 3.95                 | [21]      | Includes costs of strip, container, gloves, apron, nurse time                                                                                                                                                                                                                                                                                                                                                                   |
|                        | Trimethoprim (200mg twice daily for 7 days)                         | 3.01                 | [22]      | Pack of 14 tablets                                                                                                                                                                                                                                                                                                                                                                                                              |
|                        | Nitrofurantoin (50mg immediate release four times daily for 7 days) | 9.36                 | [22]      | Pack of 28 tablets                                                                                                                                                                                                                                                                                                                                                                                                              |
|                        | Total Cost                                                          | 10.04                | -         | Average cost of antibiotics taken as both trimethoprim/nitrofurantoin can be used                                                                                                                                                                                                                                                                                                                                               |
| Retrograde Ejaculation |                                                                     | 0                    | N/A       | Complication is rarely treated unless participant would like to start a family. Average age of patients was 66 (PAE) and 70 (TURP).                                                                                                                                                                                                                                                                                             |

\* Unspecified Haematuria with Major CC (HRG Code LB38A): £1927  
Unspecified Haematuria without Major CC (HRG Code LB38B): £706

\*\*Urinary Incontinence and Other Urinary Problems with Major CC (HRG Code LB16A): £2,010  
Urinary Incontinence and Other Urinary Problems with Intermediate CC (HRG Code LB16B): £985  
Urinary Incontinence and Other Urinary Problems without CC (HRG Code LB16C): £615
